# Supplementary material for: Evaluation of Antitumor Activity of Reprogrammed Spleen CD8+ T-Cells in a Lewis Lung Cancer Mouse Model
Source: Preprints.org preprint supplement (doi:10.20944/preprints202404.1191.v1), 2024-04-18
Supplement: Supplementary file 1 [file supplementary]

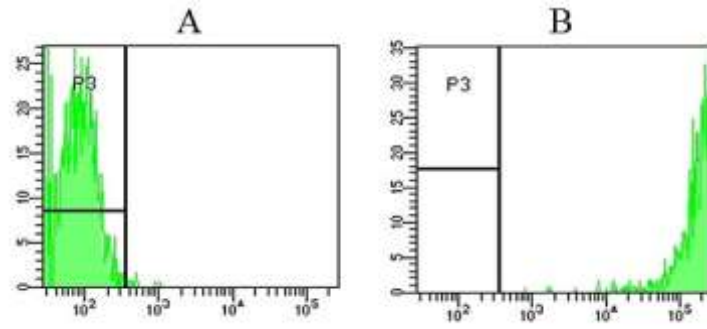

**Figure S1.** The control of vital dye CFSE labeling of CD8 T-cells prior to cell therapy. (a) Unlabeled cells; (b) cells labeled with CFSE.

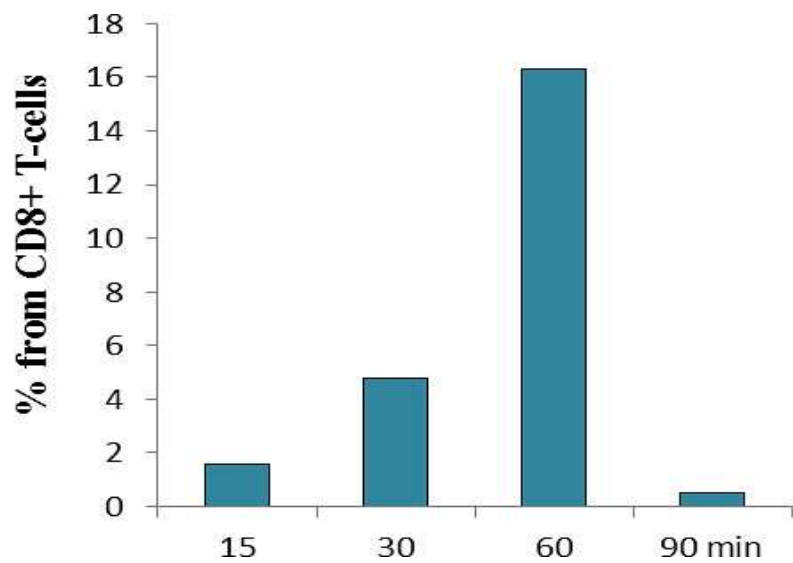

**Figure S2.** The content of CFSE-labeled CD8<sup>+</sup> T-cells (% of the CD8<sup>+</sup> T-cell population) isolated from the spleen of C57BL/6 donor mice in the lungs of C57BL/6 recipient mice 15, 30, 60, 90 min after cell therapy (M $\pm$ m).
